# Supplementary material for: Web-based Application Integration to Improve Patient Satisfaction: A Model for Improving the Quality of Health Services in Hospitals
Source: Research Square preprint supplement (doi:10.21203/rs.3.rs-7446810/v1), 2025-09-17
Supplement: Supplementary file 1 [file 1d8253606d7c51b4fd791a6f.pdf]

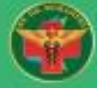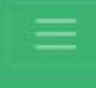

## INFORMATION SYSTEMS SERVICE SATISFACTION (Attitude)

Hospital DR. The City Council Is Similar

### Characteristics Of Respondents

Name

E-mail

Gender

- Please Select-

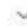

Education

- Please Select-

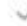

Jobs

## Characteristics Of Respondents

---

Name

full name

E-mail

email address

Gender

- Please Select-

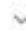

Education

- Please Select--

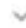

Jobs

- Please Select-

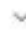

Age

Enter age

## MEDICAL QUESTIONNAIRE

1.

How do you assess the ease in outpatient registration process?

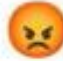

Very Not  
Satisfied

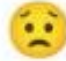

No  
Satisfied

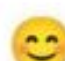

Satisfied

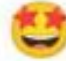

Very  
Satisfied

2.

What is the waiting time to get outpatient services are in accordance with your hope?

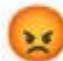

Very Not  
Satisfied

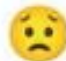

No  
Satisfied

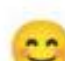

Satisfied

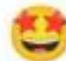

Very  
Satisfied

3.

How do you feel about your assessment of cleanliness and comfort of the waiting room outpatient?

3.

How do you feel about your assessment  
of cleanliness and comfort of the waiting room  
outpatient?

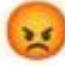

Very Not  
Satisfied

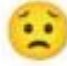

No  
Satisfied

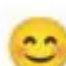

Satisfied

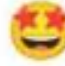

Very  
Satisfied

4.

Whether medical personnel provide  
clear and understandable explanations  
about your condition and treatment?

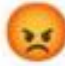

Very Not  
Satisfied

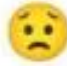

No  
Satisfied

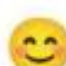

Satisfied

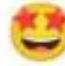

Very  
Satisfied

5.

How do you feel about your assessment of  
friendliness and professionalism of personnel  
medical who serves you on an outpatient basis?

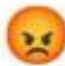

Very Not  
Satisfied

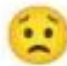

No  
Satisfied

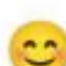

Satisfied

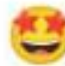

Very  
Satisfied

road ?

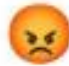

Very Not  
Satisfied

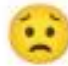

No  
Satisfied

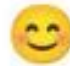

Satisfied

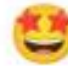

Very  
Satisfied

7.

How satisfied are you with the results  
the treatment you received on an outpatient basis?

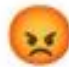

Very Not  
Satisfied

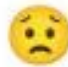

No  
Satisfied

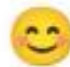

Satisfied

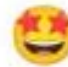

Very  
Satisfied

Criticism & Suggestions :

0/50 character

Make sure all answers are correct before  
complete the questionnaire.

☐ Yes, the questionnaire has been completed correctly
